# Supplementary material for: Machine learning guided microwave-assisted quantum dot synthesis and an indication of residual H2O2 in human teeth
Source: Royal Society of Chemistry journal article supplement (doi:10.1039/d2nr03718a), 2022-01-01
Supplement: d2nr03718a1.pdf [file d2nr03718a1.pdf]

### Supplementary information

#### Machine Learning Guided Microwave-Assisted Quantum Dot Synthesis and detection of residual H<sub>2</sub>O<sub>2</sub> in human teeth

Quan Xu<sup>a\*</sup>, Yaoyao Tang<sup>a</sup>, Peide Zhu<sup>a</sup>, Weiye Zhang<sup>a</sup>, Yuqi Zhang<sup>a</sup>, Oliver Sanchez Solis<sup>b</sup>, Travis Shihao Hu<sup>b</sup>, Juncheng Wang<sup>c\*</sup>

<sup>a</sup> State Key Laboratory of Heavy Oil Processing, China University of Petroleum (Beijing), Beijing 102249, China.

<sup>b</sup> Department of Mechanical Engineering, California State University, Los Angeles, California 90032, USA

<sup>c</sup> Institute of Stomatology, First Medical Center, Chinese PLA General Hospital, Beijing 100853, China

## 1 Experimental

**Materials.** Citric acid monohydrate (99.5%) was purchased from Shanghai Hutest Laboratory Equipment Co., LTD. Ethylenediamine (99%) was purchased from Shandong West Asia Chemical Industry Co. LTD. H<sub>2</sub>O<sub>2</sub> (30%) was purchased from Damao Chemical Reagent Factory. All chemicals are of analytical grade for direct use without further purification. Deionized water produced by BK-10B from Dongguanshi Qianjing environmental equipment Co, Ltd was used in all the experiments.

**Synthesis of CDs.** Citric acid monohydrate (0.6-1.5 g) was dissolved in deionized water (10-20 mL). The ethylenediamine (0.5-1.0 mL) was added dropwise with consistent and quick stirring. Then, the clear solution was put into a microwave oven (Galanz, P70D20TL-D4) and heated for some time at different microwave intensities. When the solution was cooled, it was filtered through a 0.22 μm polytetrafluoroethylene membrane to remove impurities to obtain the final CDs.

**Machine learning models.** All the code was run on the anaconda. Data was processed using the Pandas and Numpy library. The models of decision tree (DT), multilayer perceptron (MLP), random forest (RF), and XGBoost (XGB) were constructed by importing Scikit-Learn. The parameter and hyperparameter were optimized by combining the grid search algorithm and five-fold cross-validation. All of these data, code, and result can be obtained from Github. The link is [https://github.com/yaoyaotang2000/ML\\_B-CDs](https://github.com/yaoyaotang2000/ML_B-CDs).

**Characterization.** The morphology and microstructure of the CDs were examined by using Transmission electron microscopy (TEM) and high-resolution transmission electron microscopy (HRTEM) on a Philips Tecnai G2 F20 microscope (Philips, Netherlands) with an accelerating voltage of 200 kV. The atom force microscope (AFM) (Bruker Scan-Dimension-Icon System) was used to study the surface of the microstructure. The X-ray diffraction (XRD) was measured by Bruker D2 Phaser with an angle range from 5° to 90°. The measurement of optical character including photoluminescence, optical absorption, the photoluminescence quantum yield, and life curves used a fluorescence spectrometer (FS5) from Techcomp (China Ltd). The CD solution (30 μL) was diluted 100 times using deionized water to obtain the map of the emission spectrum. The quantum yield was measured using an FS-30 quantum yield accessory with an integrating sphere under the excitation and emission of 320 nm. The UV-Vis absorption spectra of the samples were measured using an FS-05. The FT-IR was measured on a Nicolet iS50 to characterize the functional group on the surface of CDs. The XPS was measured on the AXIS SUPRA<sup>+</sup> to analyze surface composition.

**Detection of H<sub>2</sub>O<sub>2</sub> using CDs.** The standard solution of eight metal ions (Li<sup>+</sup>, Mg<sup>2+</sup>, Zn<sup>2+</sup>, Mn<sup>2+</sup>, Na<sup>+</sup>, Cd<sup>2+</sup>, K<sup>+</sup>, Ca<sup>2+</sup>) and H<sub>2</sub>O<sub>2</sub> with 200 μmol/L concentration were prepared to detect the selectivity of CDs. 30 μL CDs were added into different standard solutions diluting 3 ml and were recorded with the excitation wavelength of 320 nm. Different volumes of H<sub>2</sub>O<sub>2</sub> (0-1.1 M) were separately added into CDs solution and the photoluminescence intensity was recorded with the excitation wavelength of 320 nm.

## 2 Supplementary Figures and Tables

### List of Figure

**Fig S1.** Histogram of microwave-assisted synthesis of CDs data over each feature

**Fig S2.** The Performance of XGBoost vs data set ranges from 100 to 190

**Fig S3.** Quantitative comparison among candidate models for the microwave-assisted synthesis of CDs

**Fig S4.** Predictions from the trained model, which is represented in heat map by the two most important features.

**Fig S5.** The stability of CDs and UV-Vis absorption spectrum of CDs before and after reacting with H<sub>2</sub>O<sub>2</sub>.

**Fig S6.** The photos of the surface were taken before and after soaking.

**Fig S7.** The photos of the polished surface were taken before and after soaking.

**Fig S8.** The fluorescence of CDs on the teeth surface after adding deionized water solution under UV light.

**Fig S9.** The stability of CDs vs pH solutions ranges from 1 to 12.

### List of Tables

**Table S1.** Optimal feature overview for the microwave-assisted synthesis of CDs dataset

**Table S2.** The input range of parameters in the microwave-assisted system

**Table S3.** The elements ratio of CDs in the XPS survey spectrum.

## 2.1 Supplementary Figures

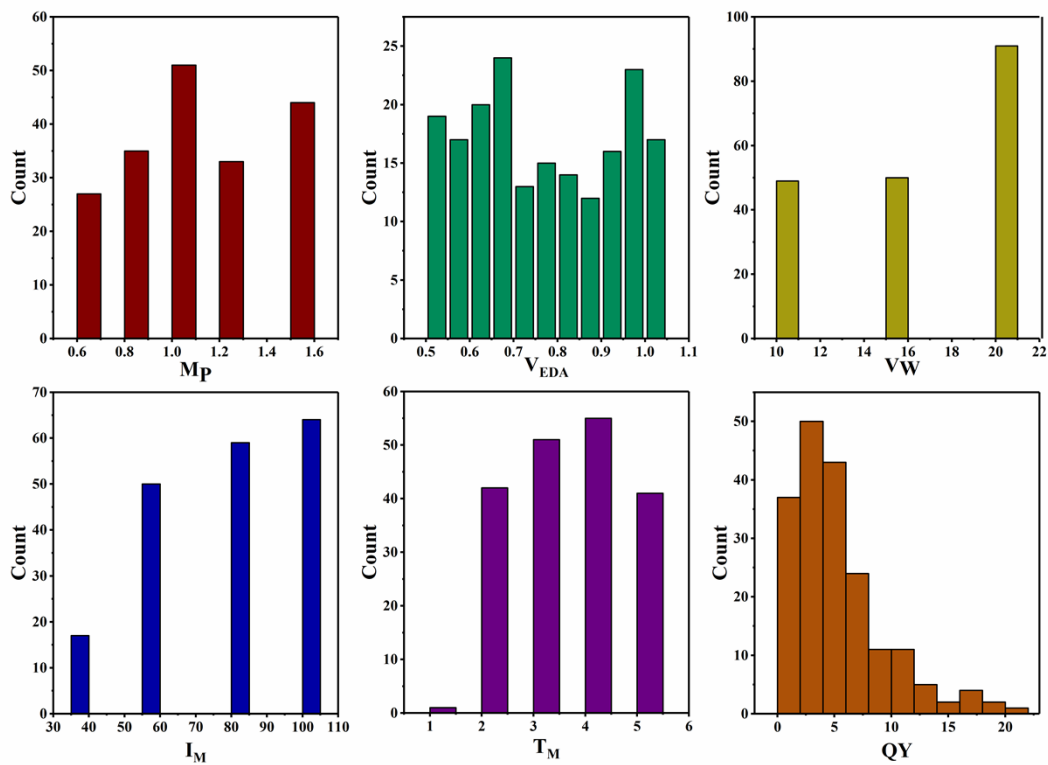

**Fig S1.** Histogram of microwave-assisted synthesis of CDs over each feature.

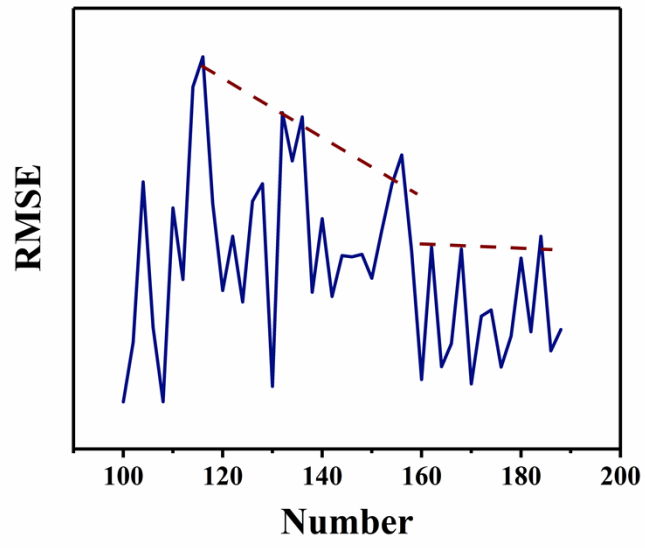

**Fig S2.** The performance of XGBoost vs data set ranges from 100 to 190

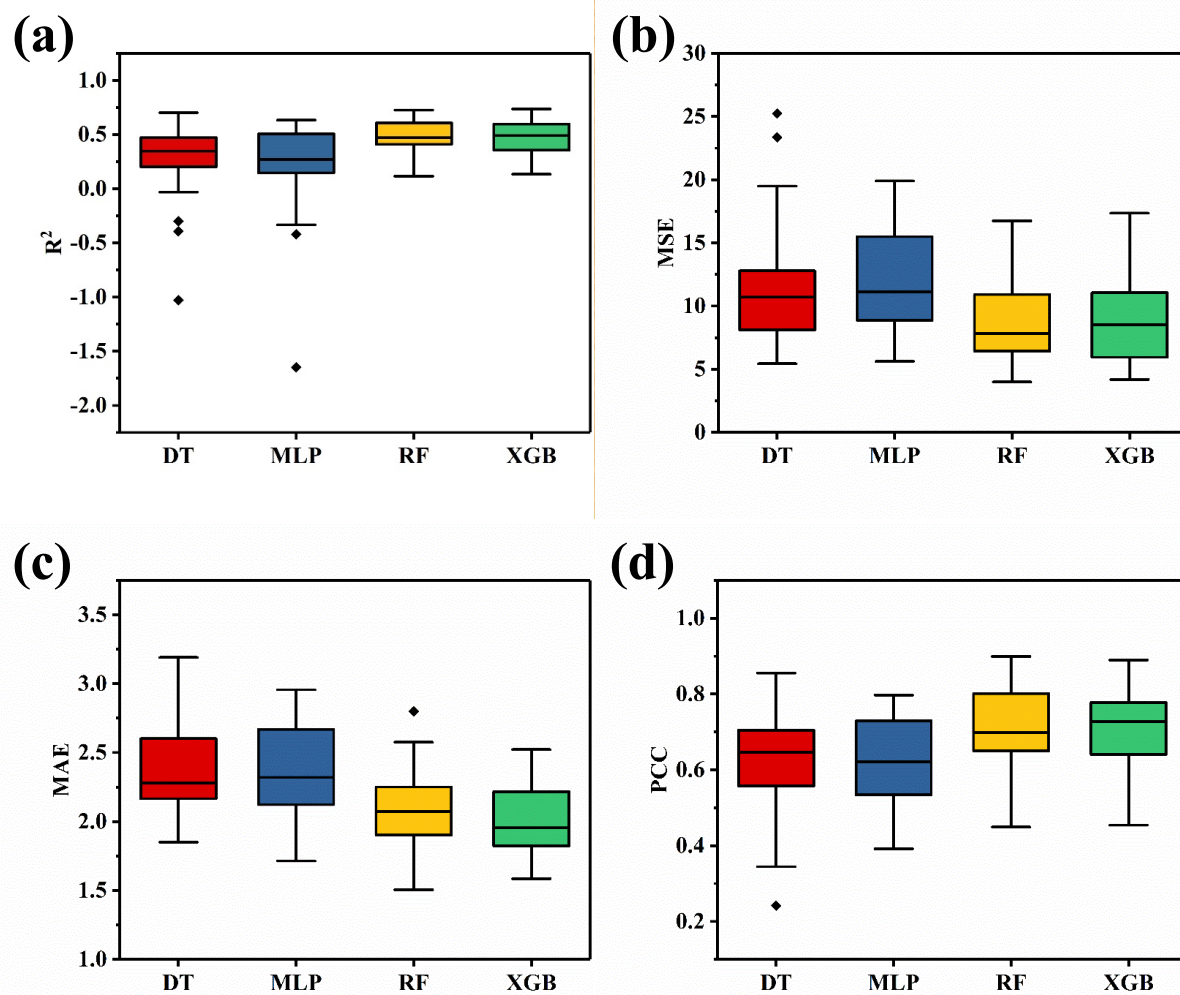

**Fig S3.** Boxplots among candidate models for the microwave-assisted synthesis of CDs through 6 repetitions \* 5-fold cross. Red, blue, yellow, and green boxes represent the decision tree (DT), multilayer perceptron (MLP), random forest (RF), and XGBoost (XGB), respectively. (a) Boxplots compare four coefficients of mean square error (MSE). (b) Mean absolute error (MAE). (c) Coefficient of determination ( $R^2$ ). (d) Pearson's correlation coefficient (PCC).

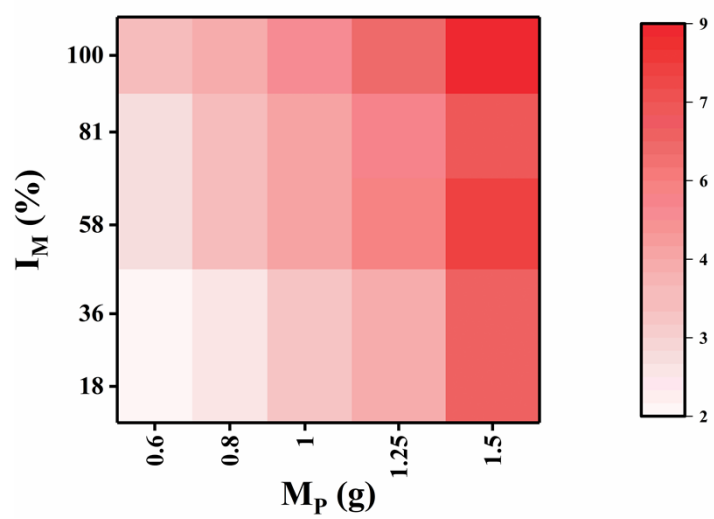

**Fig S4.** Predictions from the trained model, which is represented in heat map by the two most important features.

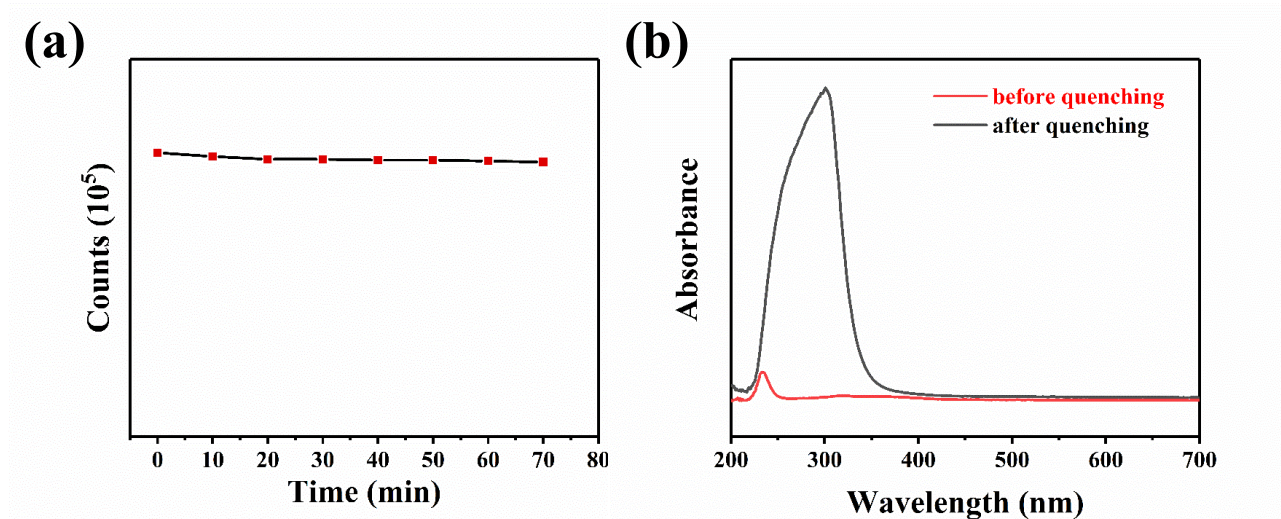

**Fig S5.** The stability of CDs vs times. (b) The UV-Vis absorption spectra of CDs before and after reacting with H<sub>2</sub>O<sub>2</sub>.

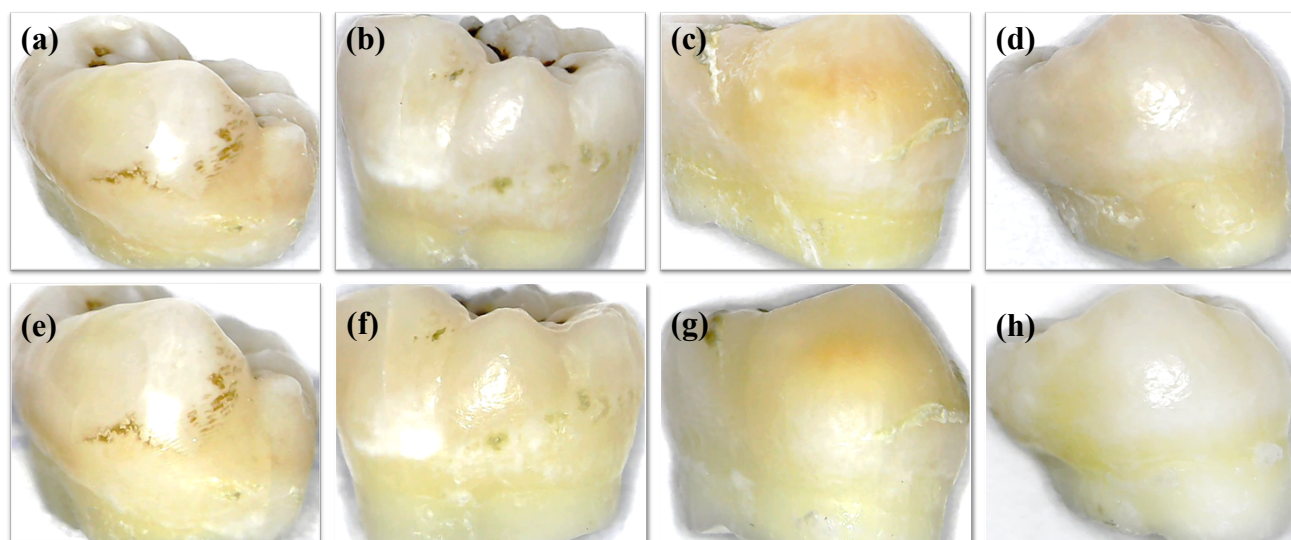

**Fig S6.** Photos of teeth taken before and after soaking, (a-d) the photos before soaking, (e-h) the photos after soaking. The comparison of the control group before (a) and after soaking (e) in deionized water. The comparison of the experimental group before (b) and after soaking (f) in deionized water. The comparison of the experimental group before (c) and after soaking (g) in the volume fraction of 5%. The comparison of the experimental group before (d) and after soaking (h) in the volume fraction of 10%.

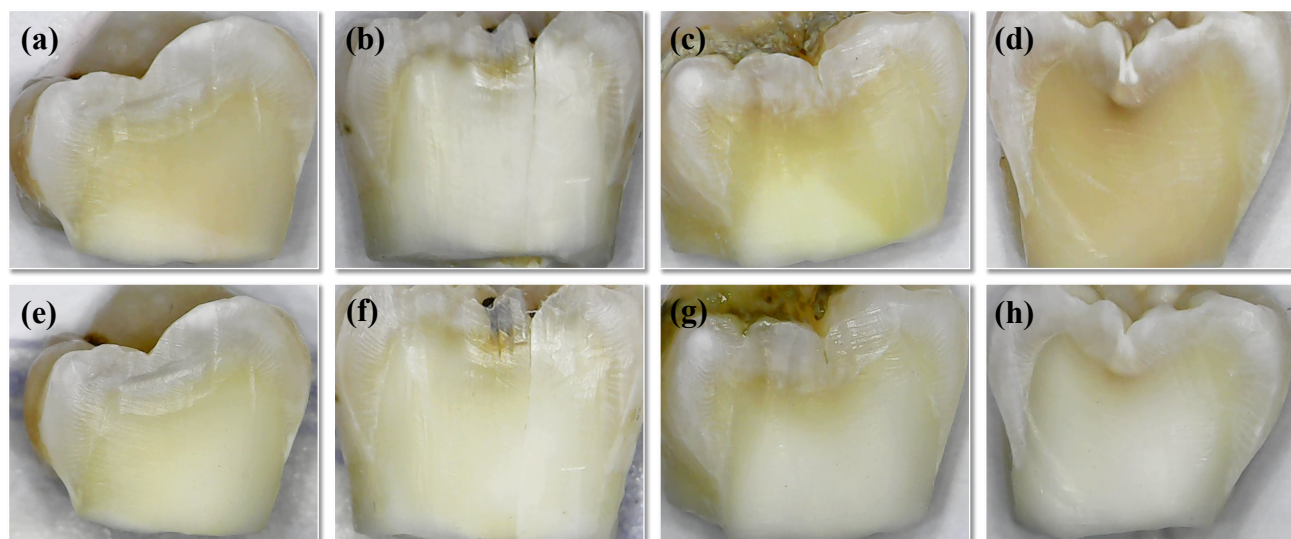

**Fig S7.** The photos of the polished surfaces were taken before and after soaking. (a-d) all the teeth before soaking. (e-h) All the teeth after soaking. The comparison of the control group before (a) and after soaking (e) in deionized water. The comparison of the experimental group before (b) and after soaking (f) in deionized water. The comparison of the experimental group before (c) and after soaking (g) in the volume fraction of 5%. The comparison of the experimental group before (d) and after soaking (h) in the volume fraction of 10%.

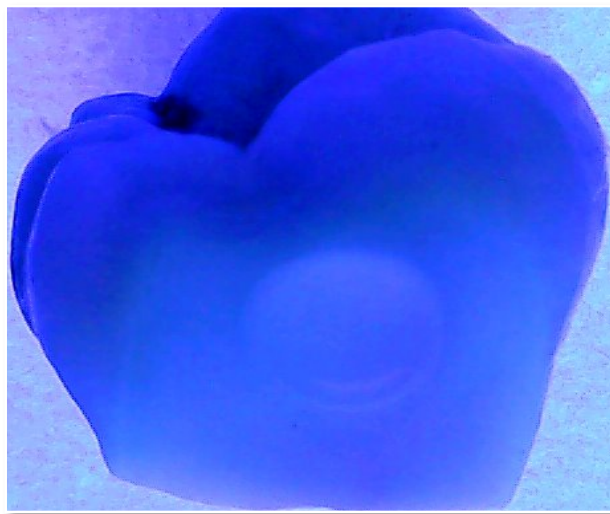

**Fig S8.** The fluorescence of CDs on the teeth surface after adding deionized water solution under UV light.



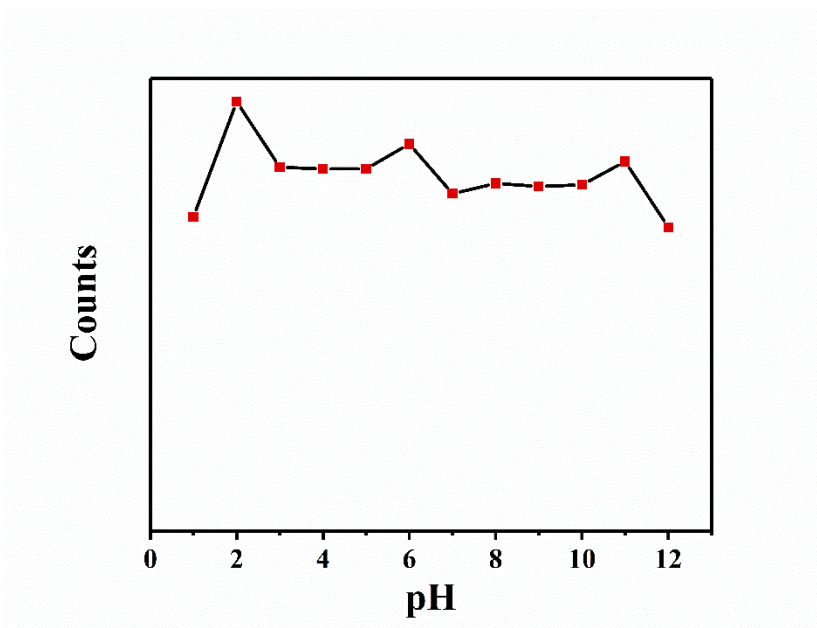

**Fig S9.** The stability of CDs vs pH solutions ranges from 1 to 12.

## 2.2 Supplementary Tables

**Table S1** Five features listed above are employed to predict the QY.

| Feature             | Notation  | Unit | Mean  | Standard deviation |
|---------------------|-----------|------|-------|--------------------|
| Mass of precursor   | $M_P$     | g    | 1.06  | 0.31               |
| EDA volume          | $V_{EDA}$ | ml   | 0.74  | 0.16               |
| Water volume        | $V_W$     | ml   | 16.10 | 4.16               |
| Microwave intensity | $I_M$     | %    | 77.32 | 20.75              |
| Microwave time      | $T_M$     | min  | 3.49  | 1.08               |
| Quantum yield       | QY        | %    | 5.25  | 4.17               |

**Table S2** Change range and increment value of five input parameters

| Parameter               | Min                      | Max | Increment |
|-------------------------|--------------------------|-----|-----------|
| Mass of precursor (g)   | 0.6, 0.8, 1.0, 1.25, 1.5 |     |           |
| EDA volume (ml)         | 0.5                      | 1.0 | 0.05      |
| Water volume (ml)       | 10                       | 20  | 5         |
| Microwave intensity (%) | 18, 36, 58, 81, 100      |     |           |
| Microwave time (min)    | 2                        | 5   | 1         |

**Table S3** The elements ratio of CDs in the XPS survey spectrum.

| elements       | C     | N     | O     |
|----------------|-------|-------|-------|
| Percentage (%) | 66.27 | 10.41 | 23.32 |
